# Supplementary material for: The impact of genome-wide histocompatibility on liver transplantation outcomes
Source: bioRxiv or medRxiv preprint supplement (doi:10.1101/2024.07.16.24310481), 2024-11-25
Supplement: Supplementary file [file media-1.pdf]

## SUPPLEMENTARY DATA

### The impact of genome-wide histocompatibility on liver transplantation outcomes

Semenova M<sup>1</sup>, Liukkonen V<sup>2,3</sup>, Markkinen S<sup>1</sup>, Färkkilä M<sup>2</sup>, Nordin A<sup>4</sup>, Partanen J<sup>1</sup>, Åberg F<sup>4</sup>, Hyvärinen K<sup>1\*</sup>

1. *Finnish Red Cross Blood Service, Research and Development, Helsinki, Finland*
2. *University of Helsinki, Faculty of Medicine, Helsinki, Finland*
3. *North Carelia Central Hospital, Gastroenterology, Joensuu, Finland*
4. *Transplantation and Liver Surgery, Helsinki University Hospital and University of Helsinki, Helsinki, Finland*

Short title: Genome-wide mismatches in liver transplantation

Corresponding author:

Kati Hyvärinen, PhD, Associate professor

Finnish Red Cross Blood Service

Research and Development

Biomedicum Helsinki 1, Haartmaninkatu 8, 00290 Helsinki, FINLAND

Phone +358 40 920 3083

kati.hyvarinen@bloodservice.fi

## Table of Contents

|                                                                                                                                                                                                      |    |
|------------------------------------------------------------------------------------------------------------------------------------------------------------------------------------------------------|----|
| Supplementary Table S1. Number of deletion-tagging variant mismatches in the study cohort. ....                                                                                                      | 3  |
| Supplementary Table S2. Summary statistics of adjusted Cox proportional hazards models analyzing the effect of mismatches in 40 deletion-tagging variants and time to acute rejection .....          | 5  |
| Supplementary Table S3. Summary statistics of adjusted Cox proportional hazards models analyzing the effect of mismatches in 40 deletion-tagging variants and time to late rejection .....           | 6  |
| Supplementary Table S4. Summary statistics of adjusted Cox proportional hazards models analyzing the effect of mismatches in 40 deletion-tagging variants and time to graft loss.....                | 7  |
| Supplementary Table S5. Summary statistics of adjusted Cox proportional hazards models analyzing the effect of mismatches in 40 deletion-tagging variants and time to death. ....                    | 8  |
| Supplementary Table S6. Adjusted Cox proportional hazards model for rs11985201 mismatch and time to acute rejection. ....                                                                            | 9  |
| Supplementary Table S7. Adjusted Cox proportional hazards model for rs2342606 mismatch and time to acute rejection. ....                                                                             | 10 |
| Supplementary Table S8. Adjusted Cox proportional hazards model for rs1944862 mismatch and time to late rejection. ....                                                                              | 11 |
| Supplementary Table S9. Adjusted Cox proportional hazards model for rs2174926 mismatch and time to graft loss. ....                                                                                  | 12 |
| Supplementary Figure S1. Flow of genetic variants in in pre- and post-imputation processes. ....                                                                                                     | 13 |
| Supplementary Figure S2. Kaplan-Meier plot displaying the effect of quartiles of missense variant mismatches of all proteins on late rejection -free survival. ....                                  | 14 |
| Supplementary Figure S3. Kaplan-Meier plot displaying the effect of quartiles of missense variant mismatches of transmembrane proteins only on graft loss -free survival.....                        | 15 |
| Supplementary Figure S4. Kaplan-Meier plot displaying the estimated probability of acute rejection - free survival in quartiles of overall deletion mismatch sums between recipients and donors..... | 16 |
| Supplementary Figure S5. Kaplan-Meier plot displaying the estimated probability of late rejection - free survival in quartiles of overall deletion mismatch sums between recipients and donors.....  | 17 |
| Supplementary Figure S6. Kaplan-Meier plot displaying the estimated probability of graft loss -free survival in quartiles of overall deletion mismatch sums between recipients and donors. ....      | 18 |
| Supplementary Figure S7. Kaplan-Meier plot displaying the estimated probability of overall survival in quartiles of overall deletion mismatch sums between recipients and donors.....                | 19 |

**Supplementary Table S1. Number of deletion-tagging variant mismatches in the study cohort.**

| CHR | Deletion-tagging variant | A1 | A2 | MAF  | Number of mismatches <sup>a</sup> (%) |                     |                         |                     |                 |                    |                             |                         | Affected genes <sup>b</sup>                                |
|-----|--------------------------|----|----|------|---------------------------------------|---------------------|-------------------------|---------------------|-----------------|--------------------|-----------------------------|-------------------------|------------------------------------------------------------|
|     |                          |    |    |      | No rejection (n = 389)                | Rejection (n = 277) | No graft loss (n = 624) | Graft loss (n = 42) | Alive (n = 503) | Deceased (n = 163) | No late rejection (n = 569) | Late rejection (n = 97) |                                                            |
| 1   | rs10927864               | G  | C  | 0.27 | 28 (7)                                | 16 (6)              | 42 (7)                  | 2 (5)               | 33 (7)          | 11 (7)             | 38 (7)                      | 6 (6)                   | RPS16P1                                                    |
| 1   | rs11209948               | G  | T  | 0.35 | 44 (11)                               | 31 (11)             | 71 (11)                 | 4 (10)              | 57 (11)         | 18 (11)            | 64 (11)                     | 11 (11)                 | RPL31P12                                                   |
| 1   | rs11249248               | T  | C  | 0.47 | 64 (16)                               | 43 (16)             | 101 (16)                | 6 (14)              | 85 (17)         | 22 (13)            | 92 (16)                     | 15 (15)                 | LOC100288240/R<br>HCE/SDHDP7/TM<br>EM50A                   |
| 1   | rs11587012               | C  | A  | 0.29 | 37 (10)                               | 18 (6)              | 53 (8)                  | 2 (5)               | 44 (9)          | 11 (7)             | 50 (9)                      | 5 (5)                   | LCE1D/LCE1E/LO<br>C100289267                               |
| 1   | rs158736                 | C  | G  | 0.34 | 35 (9)                                | 29 (10)             | 63 (10)                 | 1 (2)               | 52 (10)         | 12 (7)             | 58 (10)                     | 6 (6)                   | LOC100287974                                               |
| 1   | rs6693105                | T  | C  | 0.36 | 45 (12)                               | 35 (13)             | 77 (12)                 | 3 (7)               | 64 (13)         | 16 (10)            | 68 (12)                     | 12 (12)                 | LCE3B/LCE3C                                                |
| 1   | rs7542235                | G  | A  | 0.15 | 11 (3)                                | 6 (2)               | 16 (3)                  | 1 (2)               | 11 (2)          | 6 (4)              | 16 (3)                      | 1 (1)                   | CFH/CFHR1/CFHR<br>3/LOC100289145                           |
| 2   | rs7419565                | C  | T  | 0.41 | 45 (12)                               | 39 (14)             | 79 (13)                 | 5 (12)              | 70 (14)         | 14 (9)             | 73 (13)                     | 11 (11)                 | TUBA3E                                                     |
| 2   | rs893403                 | G  | A  | 0.32 | 42 (11)                               | 26 (9)              | 66 (11)                 | 2 (5)               | 48 (10)         | 20 (12)            | 55 (10)                     | 13 (13)                 | LOC100288532<br>HMGXB3/PDE6A/<br>RPS20P4/SLC26A<br>2/TIGD6 |
| 5   | rs10053292               | C  | T  | 0.10 | 6 (2)                                 | 3 (1)               | 8 (1)                   | 1 (2)               | 5 (1)           | 4 (2)              | 8 (1)                       | 1 (1)                   | BTNL3/BTNL8/LO<br>C100128762/LOC<br>646227                 |
| 5   | rs2387715                | T  | A  | 0.31 | 32 (8)                                | 25 (9)              | 55 (9)                  | 1 (2)               | 42 (8)          | 15 (9)             | 46 (8)                      | 11 (11)                 | SPINK5L2                                                   |
| 5   | rs7703761                | C  | T  | 0.45 | 63 (16)                               | 36 (13)             | 97 (16)                 | 2 (5)               | 74 (15)         | 25 (15)            | 90 (16)                     | 9 (9)                   | LOC260339                                                  |
| 6   | rs17654108               | T  | A  | 0.13 | 7 (2)                                 | 1 (0)               | 8 (1)                   | 0 (0)               | 5 (1)           | 3 (2)              | 7 (1)                       | 1 (1)                   | TRGV1/TRGV2/TR<br>GV3/TRGV4/TRG<br>V5                      |
| 7   | rs2160195                | T  | A  | 0.33 | 30 (8)                                | 30 (11)             | 59 (9)                  | 1 (2)               | 41 (8)          | 19 (12)            | 51 (9)                      | 9 (9)                   | NCAPG2                                                     |
| 7   | rs4621754                | G  | A  | 0.09 | 1 (0)                                 | 3 (1)               | 4 (1)                   | 0 (0)               | 3 (1)           | 1 (1)              | 3 (1)                       | 1 (1)                   | ZAN                                                        |
| 7   | rs4729606                | C  | T  | 0.26 | 20 (5)                                | 17 (6)              | 35 (6)                  | 2 (5)               | 30 (6)          | 7 (4)              | 32 (6)                      | 5 (5)                   | EMID2                                                      |
| 7   | rs6943474                | G  | A  | 0.47 | 86 (22)                               | 59 (21)             | 134 (21)                | 11 (26)             | 113 (22)        | 32 (20)            | 125 (22)                    | 20 (21)                 |                                                            |

|    |            |   |   |      |         |         |          |         |          |         |          |         |                         |
|----|------------|---|---|------|---------|---------|----------|---------|----------|---------|----------|---------|-------------------------|
| 8  | rs11985201 | A | G | 0.40 | 44 (11) | 43 (16) | 78 (13)  | 9 (21)  | 70 (14)  | 17 (10) | 73 (13)  | 14 (14) | ADAM3A/ADAM5<br>p       |
| 8  | rs4543566  | G | C | 0.11 | 3 (1)   | 2 (1)   | 4 (1)    | 1 (2)   | 3 (1)    | 2 (1)   | 4 (1)    | 1 (1)   | DEFA10P                 |
| 9  | rs1523688  | G | T | 0.24 | 24 (6)  | 5 (2)   | 26 (4)   | 3 (7)   | 22 (4)   | 7 (4)   | 26 (5)   | 3 (3)   | OR13C2/OR13C5           |
| 9  | rs2174926  | A | G | 0.44 | 58 (15) | 43 (16) | 90 (14)  | 11 (26) | 71 (14)  | 30 (18) | 85 (15)  | 16 (16) | LOC442434               |
| 10 | rs10885336 | A | G | 0.38 | 43 (11) | 39 (14) | 78 (13)  | 4 (10)  | 60 (12)  | 22 (13) | 68 (12)  | 14 (14) | GUCY2G                  |
| 10 | rs2342606  | T | C | 0.44 | 51 (13) | 54 (19) | 103 (17) | 2 (5)   | 82 (16)  | 23 (14) | 85 (15)  | 20 (20) | LOC642521/LOC6<br>42538 |
| 10 | rs3793917  | G | C | 0.25 | 14 (4)  | 15 (5)  | 25 (4)   | 4 (10)  | 21 (4)   | 8 (5)   | 25 (4)   | 4 (4)   | ARMS2                   |
| 11 | rs11228868 | T | C | 0.07 | 2 (1)   | 1 (0)   | 3 (0)    | 0 (0)   | 1 (0)    | 2 (1)   | 3 (1)    | 0 (0)   | TRIM48                  |
| 11 | rs1944862  | A | G | 0.30 | 23 (6)  | 26 (9)  | 47 (8)   | 2 (5)   | 37 (7)   | 12 (7)  | 34 (6)   | 15 (15) | OR4P1P                  |
| 11 | rs4882017  | A | G | 0.33 | 88 (23) | 72 (26) | 151 (24) | 9 (21)  | 119 (24) | 41 (25) | 139 (24) | 21 (22) | OR4A45P                 |
| 12 | rs1478309  | T | G | 0.18 | 14 (4)  | 7 (3)   | 20 (3)   | 1 (2)   | 16 (3)   | 5 (3)   | 18 (3)   | 3 (3)   | KLRC1/KLRC2/KL<br>RC3   |
| 13 | rs9318648  | A | G | 0.29 | 28 (7)  | 18 (6)  | 43 (7)   | 3 (7)   | 32 (6)   | 14 (9)  | 42 (7)   | 4 (4)   | LOC374491               |
| 14 | rs11156875 | G | A | 0.19 | 12 (3)  | 7 (3)   | 17 (3)   | 2 (5)   | 14 (3)   | 5 (3)   | 14 (2)   | 5 (5)   | RPL23AP70               |
| 14 | rs8007442  | T | C | 0.42 | 59 (15) | 33 (12) | 86 (14)  | 6 (14)  | 68 (14)  | 24 (15) | 83 (15)  | 9 (9)   | TRAV14DV4               |
| 14 | rs8022070  | T | C | 0.11 | 2 (1)   | 3 (1)   | 5 (1)    | 0 (0)   | 4 (1)    | 1 (1)   | 5 (1)    | 0 (0)   | LOC731308               |
| 16 | rs10521145 | A | G | 0.09 | 2 (1)   | 0 (0)   | 2 (0)    | 0 (0)   | 1 (0)    | 1 (1)   | 2 (0)    | 0 (0)   | SULT1A1                 |
| 16 | rs2244613  | G | T | 0.20 | 17 (4)  | 14 (5)  | 29 (5)   | 2 (5)   | 28 (6)   | 3 (2)   | 27 (5)   | 4 (4)   | CES4                    |
| 17 | rs16966699 | G | C | 0.12 | 7 (2)   | 3 (1)   | 10 (2)   | 0 (0)   | 8 (2)    | 2 (1)   | 10 (2)   | 0 (0)   | KRT33A, KRT33B          |
| 17 | rs8064493  | A | G | 0.21 | 22 (6)  | 9 (3)   | 30 (5)   | 1 (2)   | 26 (5)   | 5 (3)   | 30 (5)   | 1 (1)   | KRTAP9P1                |
| 19 | rs103294   | T | C | 0.29 | 35 (9)  | 19 (7)  | 50 (8)   | 4 (10)  | 30 (8)   | 16 (10) | 47 (8)   | 7 (7)   | LILRA3                  |
| 19 | rs324121   | A | G | 0.13 | 8 (2)   | 7 (3)   | 14 (2)   | 1 (2)   | 8 (2)    | 7 (4)   | 12 (2)   | 3 (3)   | LOC400713               |
| 19 | rs3810336  | A | G | 0.28 | 31 (8)  | 19 (7)  | 50 (8)   | 0 (0)   | 38 (8)   | 12 (7)  | 46 (8)   | 4 (4)   | GALP                    |
| 19 | rs4806152  | C | A | 0.23 | 22 (6)  | 13 (5)  | 34 (5)   | 1 (2)   | 29 (6)   | 6 (4)   | 31 (5)   | 4 (4)   | FFAR3/GPR42P            |

A1, minor allele; A2, major allele; CHR, chromosome; MAF, minor allele frequency

<sup>a</sup>Mismatch refers to cases in which a recipient who is homozygous for a deletion-tagging allele received a transplant from a donor with a nonhomozygous or homozygous reference allele genotype.

<sup>b</sup>Steers NJ, Li Y, Drace Z, et al. Genomic Mismatch at LIMS1 Locus and Kidney Allograft Rejection. *N Engl J Med.* 2019;380(20):1918-1928. doi:10.1056/nejmoa180373

**Supplementary Table S2. Summary statistics of adjusted Cox proportional hazards models analyzing the effect of mismatches in 40 deletion-tagging variants and time to acute rejection**

| Deletion-tagging variant | Adjusted Cox proportional hazards models <sup>a</sup> |         | FDR   |
|--------------------------|-------------------------------------------------------|---------|-------|
|                          | HR (95% CI)                                           | P-value |       |
| rs10927864               | 0.829(0.489–1.406)                                    | 0.486   | 0.881 |
| rs11209948               | 0.891(0.609–1.304)                                    | 0.552   | 0.881 |
| rs11249248               | 0.907(0.653–1.261)                                    | 0.561   | 0.881 |
| rs11587012               | 0.744(0.459–1.208)                                    | 0.232   | 0.619 |
| rs158736                 | 1.380(0.929–2.049)                                    | 0.111   | 0.504 |
| rs6693105                | 1.085(0.759–1.552)                                    | 0.654   | 0.881 |
| rs7542235                | 0.598(0.264–1.352)                                    | 0.217   | 0.619 |
| rs7419565                | 1.195(0.843–1.693)                                    | 0.317   | 0.669 |
| rs893403                 | 0.896(0.591–1.356)                                    | 0.602   | 0.881 |
| rs10053292               | 0.916(0.289–2.906)                                    | 0.882   | 0.954 |
| rs2387715                | 1.240(0.816–1.885)                                    | 0.313   | 0.669 |
| rs7703761                | 0.754(0.525–1.082)                                    | 0.126   | 0.504 |
| rs17654108               | 0.177(0.025–1.271)                                    | 0.085   | 0.504 |
| rs2160195                | 1.214(0.829–1.778)                                    | 0.318   | 0.669 |
| rs4621754                | 2.533(0.798–8.041)                                    | 0.115   | 0.504 |
| rs4729606                | 1.139(0.684–1.897)                                    | 0.618   | 0.881 |
| rs11985201               | 1.483(1.066–2.062)                                    | 0.019   | 0.448 |
| rs4543566                | 0.878(0.215–3.580)                                    | 0.856   | 0.951 |
| rs1523688                | 0.419(0.172–1.021)                                    | 0.056   | 0.448 |
| rs2174926                | 0.989(0.709–1.380)                                    | 0.948   | 0.972 |
| rs10885336               | 1.093(0.776–1.540)                                    | 0.610   | 0.881 |
| rs2342606                | 1.373(1.011–1.865)                                    | 0.042   | 0.448 |
| rs3793917                | 1.328(0.783–2.254)                                    | 0.292   | 0.669 |
| rs11228868               | 1.216(0.169–8.755)                                    | 0.846   | 0.951 |
| rs1944862                | 1.355(0.897–2.048)                                    | 0.149   | 0.542 |
| rs1478309                | 0.611(0.287–1.302)                                    | 0.201   | 0.618 |
| rs9318648                | 0.927(0.572–1.504)                                    | 0.760   | 0.950 |
| rs11156875               | 1.175(0.519–2.661)                                    | 0.699   | 0.902 |
| rs8007442                | 0.779(0.535–1.135)                                    | 0.193   | 0.618 |
| rs8022070                | 2.505(0.787–7.975)                                    | 0.120   | 0.504 |
| rs10521145               | 0(0–Inf)                                              | 0.991   | 0.991 |
| rs2244613                | 1.063(0.619–1.828)                                    | 0.824   | 0.951 |
| rs16966699               | 0.674(0.214–2.120)                                    | 0.499   | 0.881 |
| rs8064493                | 0.513(0.260–1.012)                                    | 0.054   | 0.448 |
| rs103294                 | 0.900(0.564–1.438)                                    | 0.661   | 0.881 |
| rs324121                 | 1.105(0.516–2.367)                                    | 0.797   | 0.951 |
| rs3810336                | 0.982(0.613–1.571)                                    | 0.938   | 0.972 |
| rs4806152                | 0.780(0.442–1.378)                                    | 0.392   | 0.784 |
| rs6943474                | 0.914(0.681–1.227)                                    | 0.550   | 0.881 |
| rs4882017                | 1.313(1.000–1.722)                                    | 0.050   | 0.448 |

CI, confidence interval; FDR, false detection rate; HR, hazard ratio.

<sup>a</sup> Models were adjusted with recipient and donor age, recipient and donor sex, cold ischemia time, HLA I eplet mismatch, HLA II eplet mismatch, year of transplantation, autoimmune status and calcineurin inhibitor type initial status.

**Supplementary Table S3. Summary statistics of adjusted Cox proportional hazards models analyzing the effect of mismatches in 40 deletion-tagging variants and time to late rejection**

| Deletion-tagging variant | Adjusted Cox proportional hazards models <sup>a</sup> |         | FDR   |
|--------------------------|-------------------------------------------------------|---------|-------|
|                          | HR (95% CI)                                           | P-value |       |
| rs10927864               | 1.004(0.434–2.326)                                    | 0.992   | 0.995 |
| rs11209948               | 0.967(0.513–1.823)                                    | 0.916   | 0.995 |
| rs11249248               | 0.903(0.516–1.582)                                    | 0.722   | 0.995 |
| rs11587012               | 0.625(0.252–1.552)                                    | 0.311   | 0.982 |
| rs158736                 | 0.673(0.291–1.556)                                    | 0.355   | 0.995 |
| rs6693105                | 1.003(0.544–1.847)                                    | 0.993   | 0.995 |
| rs7542235                | 0.322(0.045–2.328)                                    | 0.262   | 0.953 |
| rs7419565                | 0.869(0.463–1.633)                                    | 0.663   | 0.995 |
| rs893403                 | 1.504(0.831–2.721)                                    | 0.178   | 0.953 |
| rs10053292               | 1.025(0.140–7.524)                                    | 0.980   | 0.995 |
| rs2387715                | 1.517(0.803–2.864)                                    | 0.199   | 0.953 |
| rs7703761                | 0.608(0.304–1.214)                                    | 0.158   | 0.953 |
| rs17654108               | 0.807(0.110–5.925)                                    | 0.833   | 0.995 |
| rs2160195                | 1.039(0.522–2.069)                                    | 0.913   | 0.995 |
| rs4621754                | 1.946(0.264–14.358)                                   | 0.514   | 0.995 |
| rs4729606                | 1.025(0.413–2.545)                                    | 0.958   | 0.995 |
| rs11985201               | 1.196(0.676–2.114)                                    | 0.538   | 0.995 |
| rs4543566                | 1.439(0.196–10.554)                                   | 0.720   | 0.995 |
| rs1523688                | 0.864(0.270–2.769)                                    | 0.806   | 0.995 |
| rs2174926                | 1.173(0.681–2.020)                                    | 0.566   | 0.995 |
| rs10885336               | 1.205(0.681–2.130)                                    | 0.522   | 0.995 |
| rs2342606                | 1.530(0.926–2.528)                                    | 0.097   | 0.953 |
| rs3793917                | 0.867(0.316–2.378)                                    | 0.782   | 0.995 |
| rs11228868               | 0(0–Inf)                                              | 0.994   | 0.995 |
| rs1944862                | 2.341(1.326–4.130)                                    | 0.003   | 0.120 |
| rs1478309                | 0.930(0.291–2.964)                                    | 0.902   | 0.995 |
| rs9318648                | 0.553(0.201–1.521)                                    | 0.251   | 0.953 |
| rs11156875               | 2.558(0.925–7.074)                                    | 0.070   | 0.933 |
| rs8007442                | 0.654(0.327–1.308)                                    | 0.230   | 0.953 |
| rs8022070                | 0(0–Inf)                                              | 0.994   | 0.995 |
| rs10521145               | 0(0–Inf)                                              | 0.995   | 0.995 |
| rs2244613                | 0.820(0.299–2.248)                                    | 0.700   | 0.995 |
| rs16966699               | 0(0–Inf)                                              | 0.995   | 0.995 |
| rs8064493                | 0.145(0.020–1.057)                                    | 0.057   | 0.933 |
| rs103294                 | 0.954(0.441–2.065)                                    | 0.905   | 0.995 |
| rs324121                 | 1.179(0.365–3.810)                                    | 0.784   | 0.995 |
| rs3810336                | 0.533(0.195–1.457)                                    | 0.220   | 0.953 |
| rs4806152                | 0.595(0.215–1.652)                                    | 0.319   | 0.982 |
| rs6943474                | 0.891(0.538–1.476)                                    | 0.654   | 0.995 |
| rs4882017                | 0.946(0.581–1.540)                                    | 0.823   | 0.995 |

CI, confidence interval; FDR, false detection rate; HR, hazard ratio.

<sup>a</sup> Models were adjusted with recipient and donor age, recipient and donor sex, cold ischemia time, HLA I eplet mismatch, HLA II eplet mismatch, year of transplantation, autoimmune status and calcineurin inhibitor type initial status.

**Supplementary Table S4. Summary statistics of adjusted Cox proportional hazards models analyzing the effect of mismatches in 40 deletion-tagging variants and time to graft loss**

| Deletion-tagging variant | Adjusted Cox proportional hazards models <sup>a</sup> |         | FDR   |
|--------------------------|-------------------------------------------------------|---------|-------|
|                          | HR (95% CI)                                           | P-value |       |
| rs10927864               | 0.873(0.203–3.750)                                    | 0.855   | 0.997 |
| rs11209948               | 0.839(0.294–2.390)                                    | 0.742   | 0.997 |
| rs11249248               | 0.771(0.320–1.855)                                    | 0.561   | 0.997 |
| rs11587012               | 0.484(0.114–2.051)                                    | 0.325   | 0.997 |
| rs158736                 | 0.313(0.042–2.316)                                    | 0.255   | 0.997 |
| rs6693105                | 0.598(0.183–1.960)                                    | 0.396   | 0.997 |
| rs7542235                | 0.919(0.122–6.912)                                    | 0.935   | 0.997 |
| rs7419565                | 1.030(0.399–2.658)                                    | 0.951   | 0.997 |
| rs893403                 | 0.492(0.117–2.061)                                    | 0.332   | 0.997 |
| rs10053292               | 3.760(0.478–29.554)                                   | 0.208   | 0.997 |
| rs2387715                | 0.639(0.151–2.698)                                    | 0.543   | 0.997 |
| rs7703761                | 0.298(0.071–1.249)                                    | 0.098   | 0.980 |
| rs17654108               | 0(0–Inf)                                              | 0.996   | 0.997 |
| rs2160195                | 0.265(0.036–1.940)                                    | 0.191   | 0.997 |
| rs4621754                | 0(0–Inf)                                              | 0.997   | 0.997 |
| rs4729606                | 1.110(0.262–4.705)                                    | 0.887   | 0.997 |
| rs11985201               | 1.621(0.739–3.558)                                    | 0.228   | 0.997 |
| rs4543566                | 3.970(0.510–30.902)                                   | 0.188   | 0.997 |
| rs1523688                | 2.601(0.760–8.901)                                    | 0.128   | 0.997 |
| rs2174926                | 2.332(1.145–4.752)                                    | 0.020   | 0.800 |
| rs10885336               | 0.811(0.286–2.297)                                    | 0.693   | 0.997 |
| rs2342606                | 0.290(0.069–1.212)                                    | 0.090   | 0.98  |
| rs3793917                | 2.538(0.874–7.372)                                    | 0.087   | 0.980 |
| rs11228868               | 0(0–Inf)                                              | 0.996   | 0.997 |
| rs1944862                | 0.686(0.160–2.946)                                    | 0.613   | 0.997 |
| rs1478309                | 0.839(0.114–6.182)                                    | 0.863   | 0.997 |
| rs9318648                | 1.070(0.322–3.555)                                    | 0.912   | 0.997 |
| rs11156875               | 1.299(0.174–9.703)                                    | 0.799   | 0.997 |
| rs8007442                | 1.087(0.444–2.661)                                    | 0.854   | 0.997 |
| rs8022070                | 0(0–Inf)                                              | 0.996   | 0.997 |
| rs10521145               | 0(0–Inf)                                              | 0.997   | 0.997 |
| rs2244613                | 0.985(0.235–4.130)                                    | 0.983   | 0.997 |
| rs16966699               | 0(0–Inf)                                              | 0.996   | 0.997 |
| rs8064493                | 0.535(0.071–4.021)                                    | 0.544   | 0.997 |
| rs103294                 | 1.359(0.478–3.865)                                    | 0.565   | 0.997 |
| rs324121                 | 0.704(0.094–5.301)                                    | 0.734   | 0.997 |
| rs3810336                | 0(0–Inf)                                              | 0.995   | 0.997 |
| rs4806152                | 0.469(0.063–3.491)                                    | 0.460   | 0.997 |
| rs6943474                | 0.968(0.457–2.050)                                    | 0.932   | 0.997 |
| rs4882017                | 1.061(0.496–2.267)                                    | 0.879   | 0.997 |

CI, confidence interval; FDR, false detection rate; HR, hazard ratio.

<sup>a</sup> Models were adjusted with recipient and donor age, recipient and donor sex, cold ischemia time, HLA I eplet mismatch, HLA II eplet mismatch, year of transplantation, autoimmune status and calcineurin inhibitor type initial status.

**Supplementary Table S5. Summary statistics of adjusted Cox proportional hazards models analyzing the effect of mismatches in 40 deletion-tagging variants and time to death.**

| Deletion-tagging variant | Adjusted Cox proportional hazards models <sup>a</sup> |         | FDR   |
|--------------------------|-------------------------------------------------------|---------|-------|
|                          | HR (95% CI)                                           | P-value |       |
| rs10927864               | 0.899(0.469–1.722)                                    | 0.748   | 0.938 |
| rs11209948               | 0.806(0.478–1.361)                                    | 0.420   | 0.832 |
| rs11249248               | 0.764(0.475–1.230)                                    | 0.268   | 0.814 |
| rs11587012               | 0.792(0.425–1.477)                                    | 0.464   | 0.844 |
| rs158736                 | 0.703(0.367–1.344)                                    | 0.286   | 0.814 |
| rs6693105                | 0.759(0.444–1.299)                                    | 0.315   | 0.814 |
| rs7542235                | 1.518(0.660–3.490)                                    | 0.326   | 0.814 |
| rs7419565                | 0.725(0.416–1.266)                                    | 0.258   | 0.814 |
| rs893403                 | 1.232(0.756–2.007)                                    | 0.402   | 0.832 |
| rs10053292               | 1.748(0.546–5.593)                                    | 0.346   | 0.814 |
| rs2387715                | 1.238(0.723–2.120)                                    | 0.437   | 0.832 |
| rs7703761                | 1.151(0.743–1.785)                                    | 0.529   | 0.920 |
| rs17654108               | 4.271(1.303–13.999)                                   | 0.017   | 0.340 |
| rs2160195                | 1.487(0.917–2.411)                                    | 0.108   | 0.814 |
| rs4621754                | 1.162(0.160–8.468)                                    | 0.882   | 0.980 |
| rs4729606                | 0.858(0.399–1.844)                                    | 0.695   | 0.938 |
| rs11985201               | 0.741(0.440–1.247)                                    | 0.259   | 0.814 |
| rs4543566                | 1.272(0.175–9.248)                                    | 0.812   | 0.955 |
| rs1523688                | 1.135(0.524–2.457)                                    | 0.748   | 0.938 |
| rs2174926                | 1.329(0.887–1.990)                                    | 0.168   | 0.814 |
| rs10885336               | 1.294(0.820–2.042)                                    | 0.268   | 0.814 |
| rs2342606                | 0.724(0.448–1.170)                                    | 0.187   | 0.814 |
| rs3793917                | 1.133(0.552–2.327)                                    | 0.734   | 0.938 |
| rs11228868               | 7.554(1.767–32.295)                                   | 0.006   | 0.240 |
| rs1944862                | 1.010(0.542–1.883)                                    | 0.975   | 0.999 |
| rs1478309                | 1.027(0.420–2.514)                                    | 0.953   | 0.999 |
| rs9318648                | 1.030(0.577–1.840)                                    | 0.921   | 0.996 |
| rs11156875               | 1.273(0.517–3.136)                                    | 0.600   | 0.935 |
| rs8007442                | 0.966(0.613–1.523)                                    | 0.882   | 0.980 |
| rs8022070                | 1.001(0.137–7.321)                                    | 0.999   | 0.999 |
| rs10521145               | 5.276(0.714–38.984)                                   | 0.103   | 0.814 |
| rs2244613                | 0.406(0.129–1.274)                                    | 0.122   | 0.814 |
| rs16966699               | 1.413(0.345–5.798)                                    | 0.631   | 0.935 |
| rs8064493                | 0.624(0.252–1.543)                                    | 0.307   | 0.814 |
| rs103294                 | 1.252(0.733–2.138)                                    | 0.411   | 0.832 |
| rs324121                 | 1.791(0.825–3.888)                                    | 0.141   | 0.814 |
| rs3810336                | 1.091(0.602–1.978)                                    | 0.774   | 0.938 |
| rs4806152                | 0.799(0.348–1.833)                                    | 0.597   | 0.935 |
| rs6943474                | 0.940(0.632–1.398)                                    | 0.760   | 0.938 |
| rs4882017                | 1.095(0.759–1.579)                                    | 0.629   | 0.935 |

CI, confidence interval; FDR, false detection rate; HR, hazard ratio.

<sup>a</sup> Models were adjusted with recipient and donor age, recipient and donor sex, cold ischemia time, HLA I eplet mismatch, HLA II eplet mismatch, year of transplantation, autoimmune status and calcineurin inhibitor type initial status.



**Supplementary Table S6. Adjusted Cox proportional hazards model for rs11985201 mismatch and time to acute rejection.**

| <b>Covariate</b>                                   | <b>HR (95% CI)</b> | <b>P-value</b> |
|----------------------------------------------------|--------------------|----------------|
| rs11985201 mismatch                                | 1.483(1.066–2.062) | 0.019          |
| Recipient age                                      | 0.982(0.973–0.992) | 0.001          |
| Donor age                                          | 0.997(0.988–1.006) | 0.495          |
| Recipient sex                                      | 1.140(0.887–1.467) | 0.307          |
| Donor sex                                          | 1.172(0.912–1.506) | 0.214          |
| Cold ischemia time minutes                         | 0.999(0.998–1.000) | 0.127          |
| Eplets total HLA I                                 | 1.019(1.002–1.036) | 0.027          |
| Eplets total HLA II                                | 1.018(0.995–1.042) | 0.123          |
| Year of transplantation                            | 0.966(0.943–0.990) | 0.007          |
| Autoimmune liver disease                           | 1.260(0.978–1.623) | 0.074          |
| Initial calcineurin inhibitor type: cyclosporine A | 1.585(1.124–2.235) | 0.009          |

Autoimmune liver disease was categorized as primary or secondary liver transplantation indication of primary sclerosing cholangitis, primary biliary cholangitis, or autoimmune hepatitis. CI; confidence interval, HR; hazard ration, HLA; human leukocyte antigen.

**Supplementary Table S7. Adjusted Cox proportional hazards model for rs2342606 mismatch and time to acute rejection.**

| <b>Covariate</b>                                   | <b>HR (95% CI)</b> | <b>P-value</b> |
|----------------------------------------------------|--------------------|----------------|
| rs2342606 mismatch                                 | 1.373(1.011–1.865) | 0.042          |
| Recipient age                                      | 0.982(0.972–0.992) | <0.001         |
| Donor age                                          | 0.997(0.988–1.006) | 0.497          |
| Recipient sex                                      | 1.131(1.879–1.455) | 0.340          |
| Donor sex                                          | 1.159(1.901–1.489) | 0.250          |
| Cold ischemia time minutes                         | 0.999(0.998–1.000) | 0.164          |
| Eplets total HLA I                                 | 0.016(0.000–1.033) | 0.057          |
| Eplets total HLA II                                | 0.021(0.997–1.045) | 0.081          |
| Year of transplantation                            | 0.965(0.942–0.989) | 0.005          |
| Autoimmune liver disease                           | 1.210(1.939–1.561) | 0.141          |
| Initial calcineurin inhibitor type: cyclosporine A | 1.635(1.158–2.308) | 0.005          |

Autoimmune liver disease was categorized as primary or secondary liver transplantation indication of primary sclerosing cholangitis, primary biliary cholangitis, or autoimmune hepatitis. CI; confidence interval, HR; hazard ration, HLA; human leukocyte antigen.

**Supplementary Table S8. Adjusted Cox proportional hazards model for rs1944862 mismatch and time to late rejection.**

| <b>Covariate</b>                                   | <b>HR (95% CI)</b> | <b>P-value</b> |
|----------------------------------------------------|--------------------|----------------|
| rs1944862 mismatch                                 | 2.341(1.326–4.130) | 0.003          |
| Recipient age                                      | 0.990(0.973–1.006) | 0.225          |
| Donor age                                          | 0.993(0.979–1.008) | 0.371          |
| Recipient sex                                      | 1.318(0.862–2.014) | 0.202          |
| Donor sex                                          | 1.035(0.674–1.590) | 0.875          |
| Cold ischemia time minutes                         | 1.000(0.998–1.002) | 0.767          |
| Eplets total HLA I                                 | 1.010(0.981–1.039) | 0.512          |
| Eplets total HLA II                                | 1.032(0.992–1.074) | 0.121          |
| Year of transplantation                            | 0.983(0.942–1.026) | 0.443          |
| Autoimmune liver disease                           | 1.087(0.705–1.675) | 0.707          |
| Initial calcineurin inhibitor type: cyclosporine A | 2.151(1.128–4.100) | 0.020          |

Autoimmune liver disease was categorized as primary or secondary liver transplantation indication of primary sclerosing cholangitis, primary biliary cholangitis, or autoimmune hepatitis. CI; confidence interval, HR; hazard ration, HLA; human leukocyte antigen.

**Supplementary Table S9. Adjusted Cox proportional hazards model for rs2174926 mismatch and time to graft loss.**

| <b>Covariate</b>                                   | <b>HR (95% CI)</b>  | <b>P-value</b> |
|----------------------------------------------------|---------------------|----------------|
| rs2174926 mismatch                                 | 2.332(1.145–4.752)  | 0.020          |
| Recipient age                                      | 0.972(0.947–0.998)  | 0.034          |
| Donor age                                          | 1.030(1.002–1.059)  | 0.037          |
| Recipient sex                                      | 1.157(0.591–2.263)  | 0.671          |
| Donor sex                                          | 1.123(0.569–2.218)  | 0.738          |
| Cold ischemia time minutes                         | 1.000(0.997–1.003)  | 0.971          |
| Eplets total HLA I                                 | 0.972(0.928–1.017)  | 0.215          |
| Eplets total HLA II                                | 1.037(0.978–1.101)  | 0.227          |
| Year of transplantation                            | 0.959(0.890–1.033)  | 0.266          |
| Autoimmune liver disease                           | 1.941(1.019–3.697)  | 0.044          |
| Initial calcineurin inhibitor type: cyclosporine A | 5.629(1.331–23.809) | 0.019          |

Autoimmune liver disease was categorized as primary or secondary liver transplantation indication of primary sclerosing cholangitis, primary biliary cholangitis, or autoimmune hepatitis. CI; confidence interval, HR; hazard ration, HLA; human leukocyte antigen.

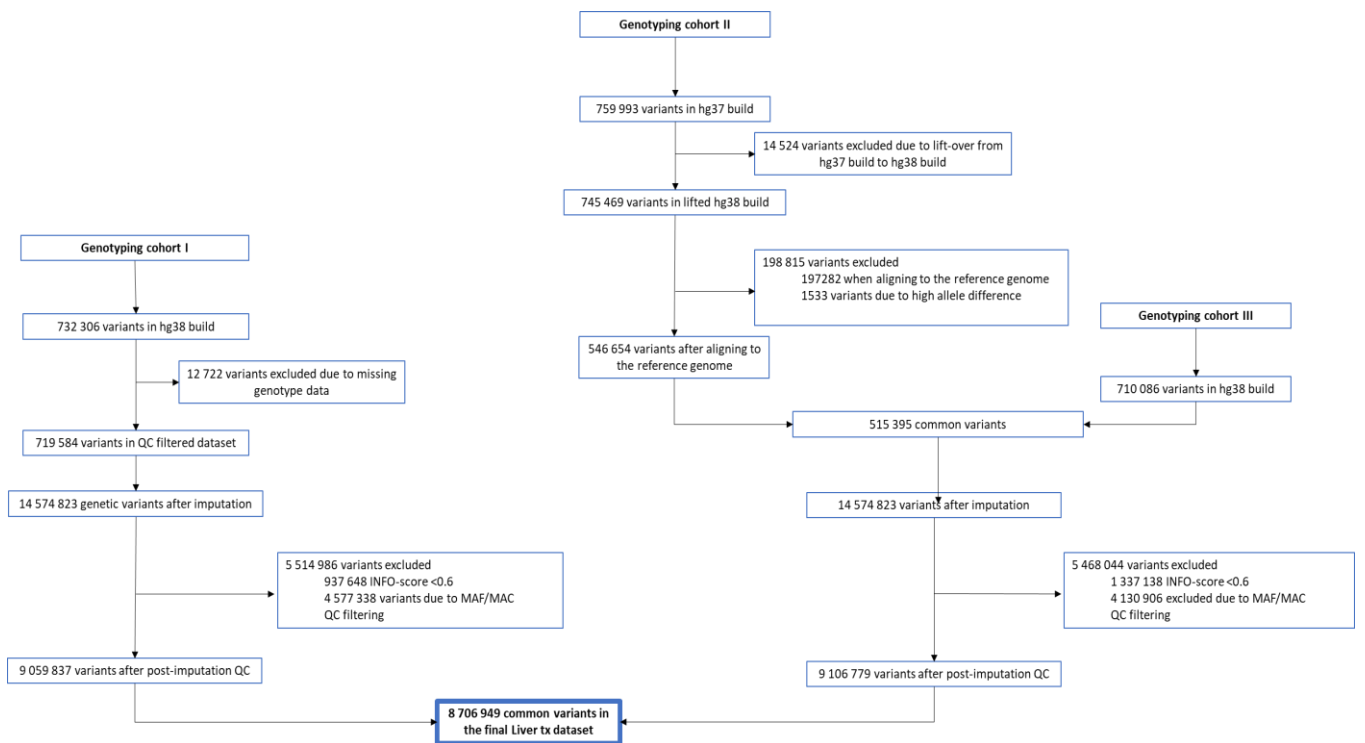

**Supplementary Figure S1. Flow of genetic variants in pre- and post-imputation processes.**

MAC, minor allele content; MAF, minor allele frequency; QC, quality control.

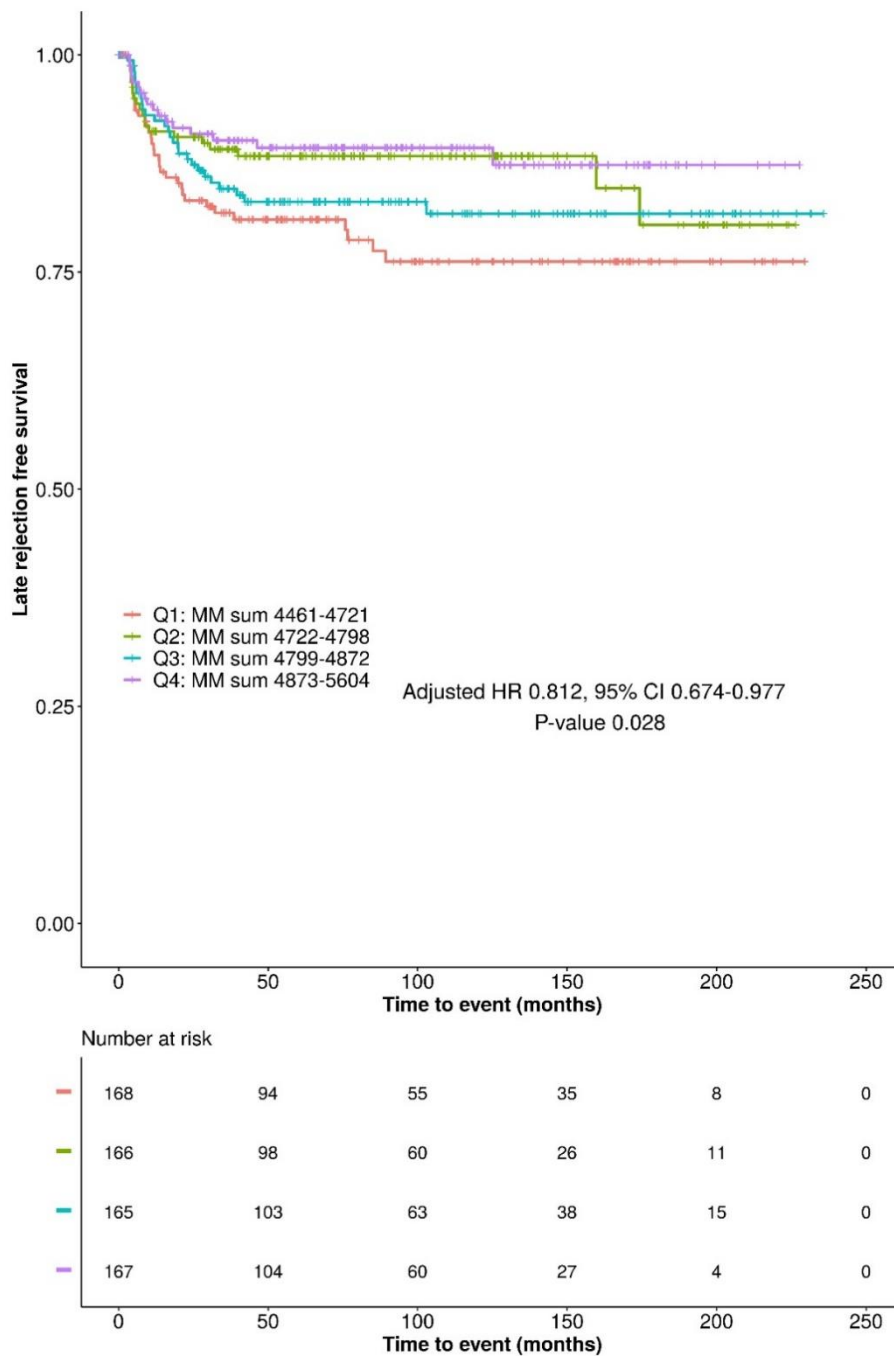

**Supplementary Figure S2. Kaplan-Meier plot displaying the effect of quartiles of missense variant mismatches of all proteins on late rejection-free survival.** The risk table shows the number of recipients in each quartile group that are at risk of late rejection at given time points. The x-axis shows time to event (late rejection or censoring) and the y-axis rejection-free survival. The presented hazard ratio, confidence intervals and P-value were calculate using Cox proportional hazards model with adjusted covariates: recipient and donor age, recipient and donor sex, cold ischemia time, HLA I eplet mismatch, HLA II eplet mismatch, year of transplantation, autoimmune liver disease and initial calcineurin inhibitor type. CI, confidence interval; HR, hazard ratio; MM, missense variant mismatch; Q1, quartile 1; Q2, quartile 2; Q3, quartile 3; Q4, quartile 4.

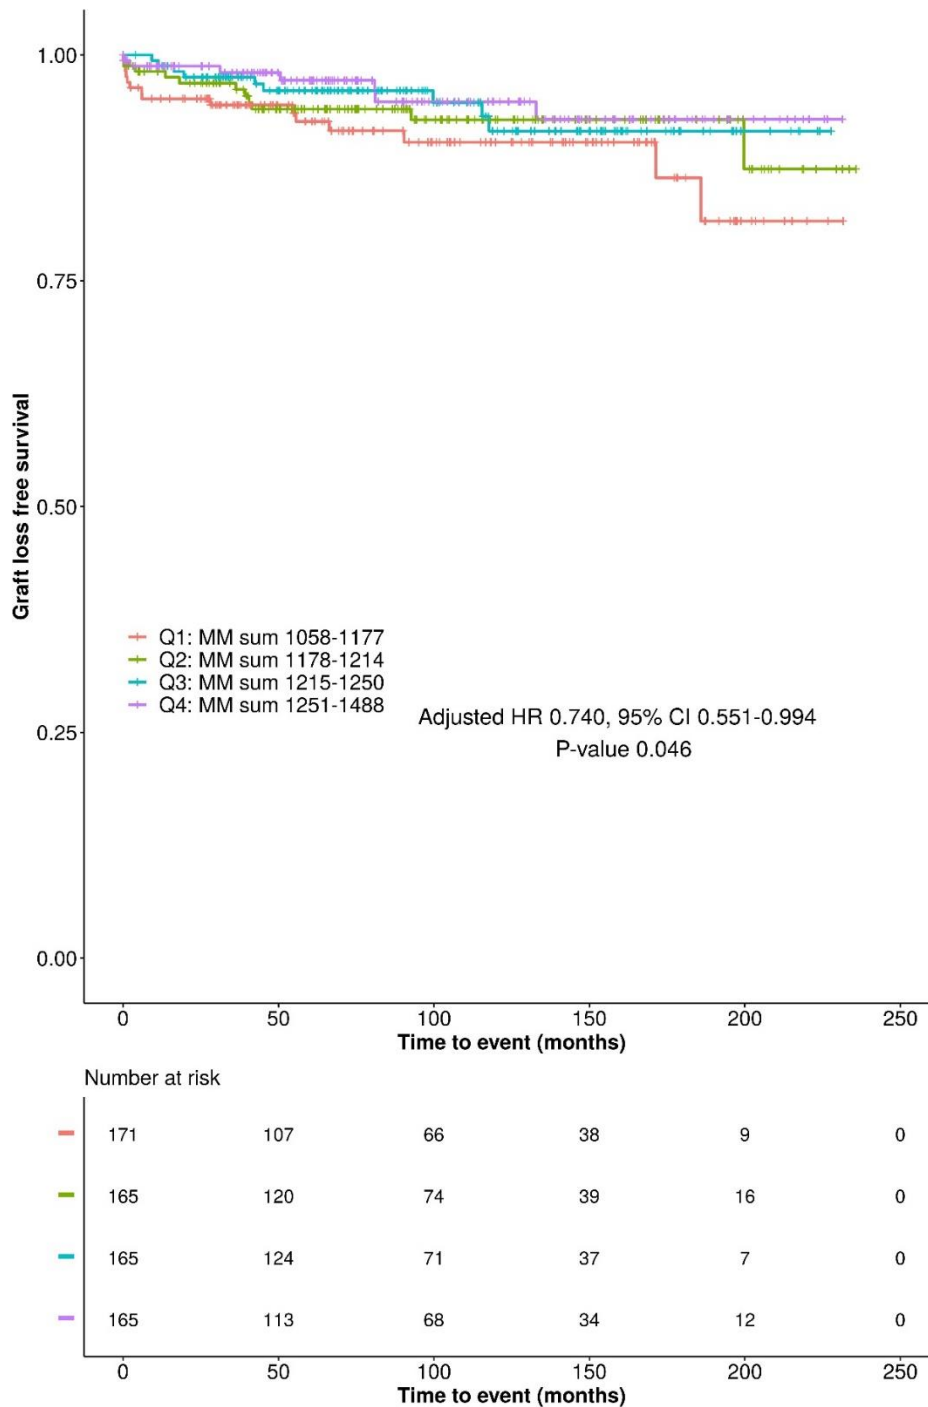

**Supplementary Figure S3. Kaplan-Meier plot displaying the effect of quartiles of missense variant mismatches of transmembrane proteins only on graft loss -free survival.** The risk table shows the number of recipients in each quartile group that are at risk of graft loss at given time points. The x-axis shows time to event (graft loss or censoring) and the y-axis rejection-free survival. The presented hazard ratio, confidence intervals and P-value were calculate using Cox proportional hazards model with adjusted covariates: recipient and donor age, recipient and donor sex, cold ischemia time, HLA I eplet mismatch, HLA II eplet mismatch, year of transplantation, autoimmune liver disease and initial calcineurin inhibitor type. CI, confidence interval; HR, hazard ratio; MM, missense variant mismatch; Q1, quartile 1; Q2, quartile 2; Q3, quartile 3; Q4, quartile 4.

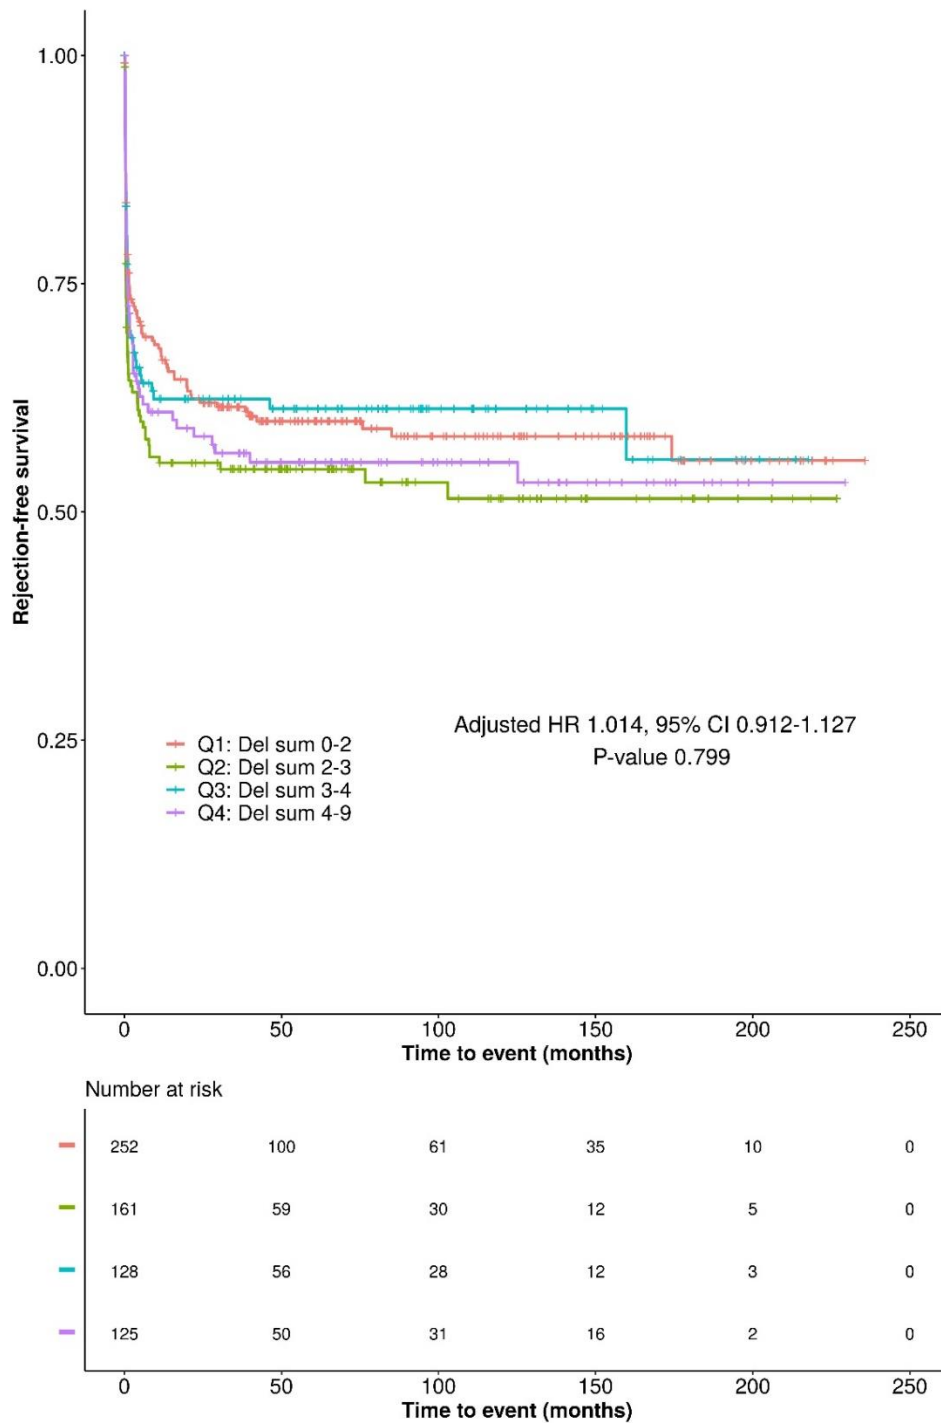

**Supplementary Figure S4. Kaplan-Meier plot displaying the estimated probability of acute rejection -free survival in quartiles of overall deletion mismatch sums between recipients and donors.** Del sum collision value indicates the number of deletion-tagging variant genotype mismatches between recipients and donors. The risk table shows the number of recipients in each quartile group that are at risk of AR at given time points. The presented hazard ratio, confidence intervals and P-value were calculate using Cox proportional hazards model with adjusted covariates: recipient and donor age, recipient and donor sex, cold ischemia time, HLA I eplet mismatch, HLA II eplet mismatch, year of transplantation, autoimmune liver disease and initial calcineurin inhibitor type. CI, confidence interval; HR, hazard ratio; Q1, quartile 1; Q2, quartile 2; Q3, quartile 3; Q4, quartile 4.



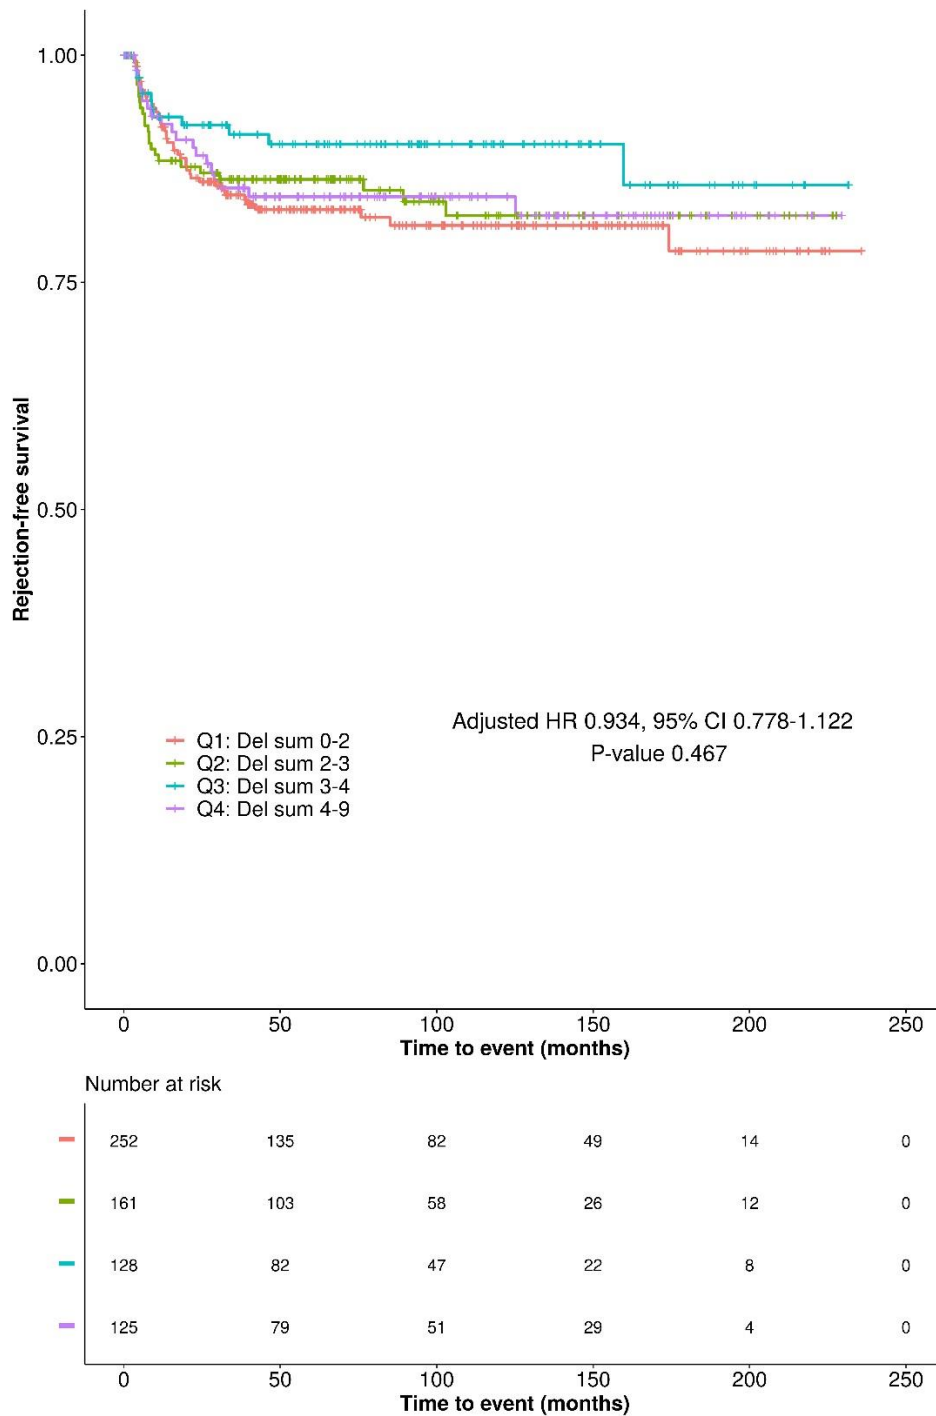

**Supplementary Figure S5. Kaplan-Meier plot displaying the estimated probability of late rejection -free survival in quartiles of overall deletion mismatch sums between recipients and donors.** Del sum collision value indicates the number of deletion-tagging variant genotype mismatches between recipients and donors. The risk table shows the number of recipients in each quartile group that are at risk of late rejection at given time points. The presented hazard ratio, confidence intervals and P-value were calculate using Cox proportional hazards model with adjusted covariates: recipient and donor age, recipient and donor sex, cold ischemia time, HLA I eplet mismatch, HLA II eplet mismatch, year of transplantation, autoimmune liver disease and initial calcineurin inhibitor type. CI, confidence interval; HR, hazard ratio; Q1, quartile 1; Q2, quartile 2; Q3, quartile 3; Q4, quartile 4.

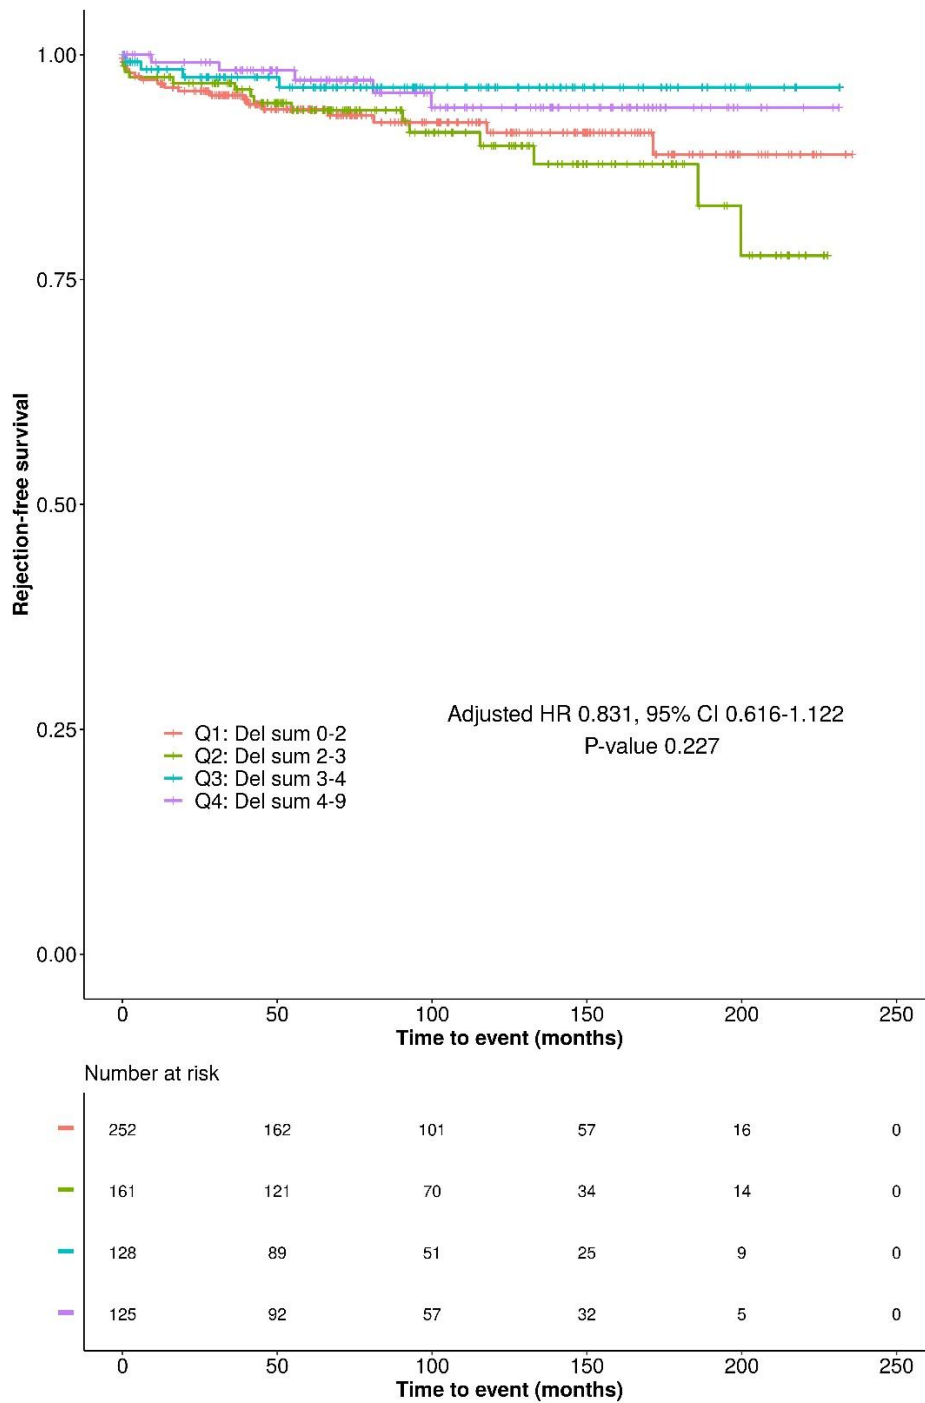

**Supplementary Figure S6. Kaplan-Meier plot displaying the estimated probability of graft loss -free survival in quartiles of overall deletion mismatch sums between recipients and donors.** Del sum collision value indicates the number of deletion-tagging variant genotype mismatches between recipients and donors. The risk table shows the number of recipients in each quartile group that are at risk of graft loss at given time points. The presented hazard ratio, confidence intervals and P-value were calculate using Cox proportional hazards model with adjusted covariates: recipient and donor age, recipient and donor sex, cold ischemia time, HLA I eplet mismatch, HLA II eplet mismatch, year of transplantation, autoimmune liver disease and initial calcineurin inhibitor type. CI, confidence interval; HR, hazard ratio; Q1, quartile 1; Q2, quartile 2; Q3, quartile 3; Q4, quartile 4.

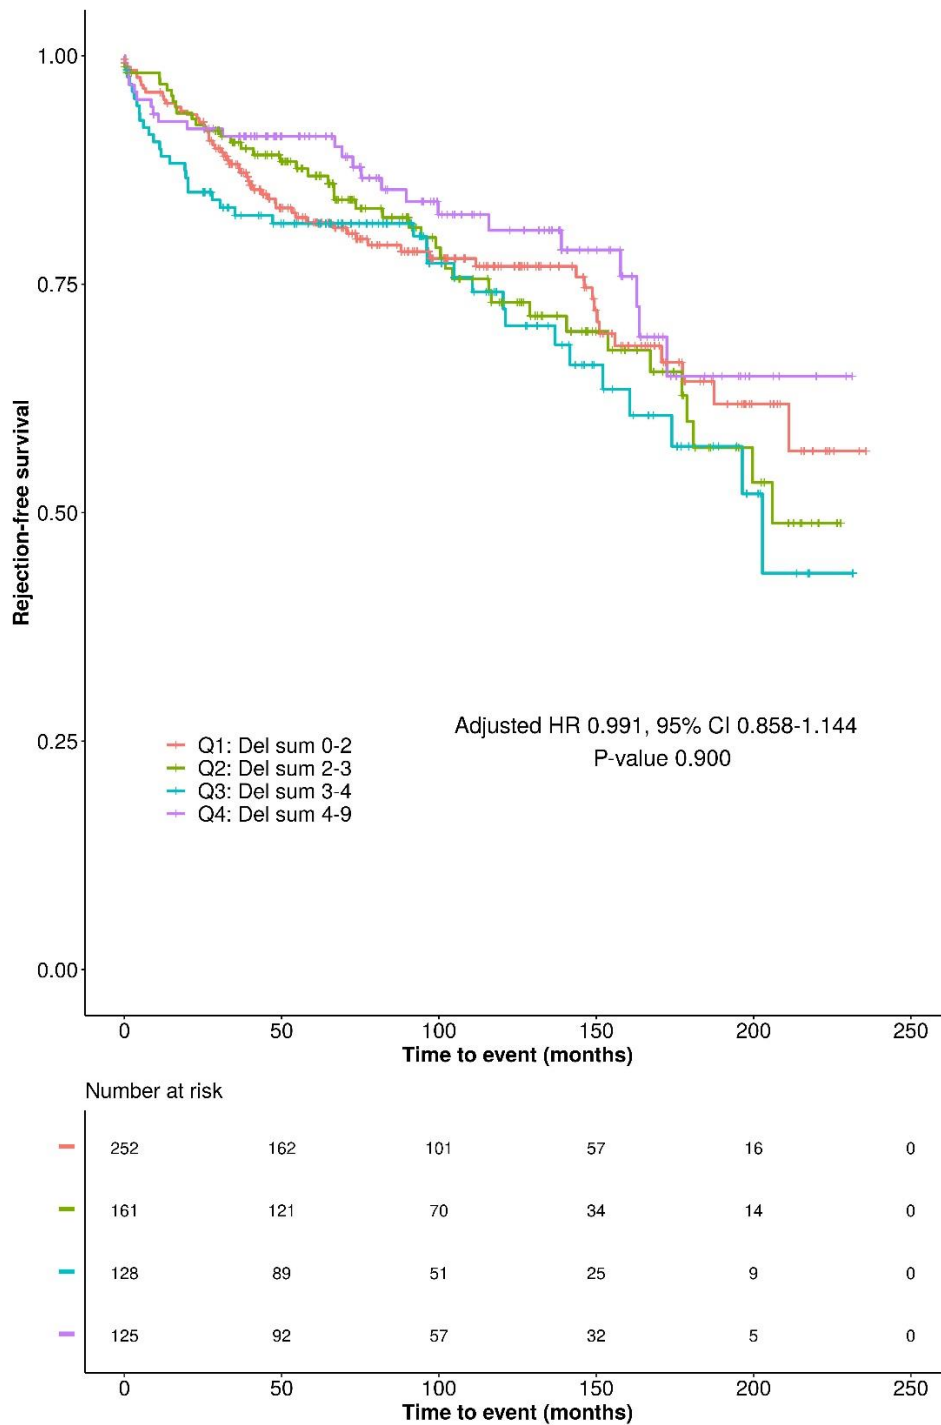

**Supplementary Figure S7. Kaplan-Meier plot displaying the estimated probability of overall survival in quartiles of overall deletion mismatch sums between recipients and donors.** Del sum collision value indicates the number of deletion-tagging variant genotype mismatches between recipients and donors. The risk table shows the number of recipients in each quartile group that are at risk of death at given time points. The presented hazard ratio, confidence intervals and P-value were calculate using Cox proportional hazards model with adjusted covariates: recipient and donor age, recipient and donor sex, cold ischemia time, HLA I eplet mismatch, HLA II eplet mismatch, year of transplantation, autoimmune liver disease and initial calcineurin inhibitor type. CI, confidence interval; HR, hazard ratio; Q1, quartile 1; Q2, quartile 2; Q3, quartile 3; Q4, quartile 4.
